# Supplementary material for: Oxidative Stress and Cardiovascular Risk Factors: The Coronary Artery Risk Development in Young Adults (CARDIA) Study
Source: Antioxidants (Basel). 2023 Feb 23;12(3):555. doi: 10.3390/antiox12030555 (PMC10044794; doi:10.3390/antiox12030555)
Supplement: Supplementary file 1 [file antioxidants-12-00555-s001.zip › antioxidants-2168325-supplementary.pdf]

## Supplements

**Supplementary Table S1.** Quality control metrics of urinary assays

|                                                        | <b>IsoP</b>          |                      | <b>IsoP-M</b>        |                      |
|--------------------------------------------------------|----------------------|----------------------|----------------------|----------------------|
|                                                        | <b>Control Set 1</b> | <b>Control Set 2</b> | <b>Control Set 1</b> | <b>Control Set 2</b> |
| <b>Number of Sample Runs, <i>n</i></b>                 | 56                   | 50                   | 50                   | 50                   |
| <b>Concentration (mean <math>\pm</math> SD), ng/ml</b> | 4.1 $\pm$ 0.9        | 17.8 $\pm$ 3.9       | 3.6 $\pm$ 0.9        | 13.7 $\pm$ 3.1       |
| <b>Intra-assay CV*</b>                                 | 6.7%                 | 5.2%                 | 6.5%                 | 6.5%                 |
| <b>Inter-assay CV*</b>                                 | 21.7%                | 21.7%                | 24.1%                | 22.9%                |

For each isoprostane entity, 2 pools of quality control samples with low and high concentration were included as duplicates in each run/batch. For each run, standard deviation of each duplicated sample divided by duplicate mean yielded sample specific intra-assay CV. Mean sample specific intraassay CV for each control set is reported as pool intra-assay CV. Sample specific Inter-assay CV was calculated as the standard deviation for mean concentration of each sample across the batches/runs divided by mean for that sample across the batches. Control set inter-assay CV was then calculated as mean of sample specific inter-assay CVs in each pool.

\* CV: Coefficient of variance

**Supplementary Table S2.** Characteristics of participants at CARDIA Y15 exam

|                                                | <b>Female<br/>(n= 1623)</b> | <b>Male<br/>(n= 1376)</b> | <b><i>p</i></b> |
|------------------------------------------------|-----------------------------|---------------------------|-----------------|
| <b>Age, years</b>                              | 40.3 ± 3.6                  | 40.2 ± 3.6                | 0.40            |
| <b>Postmenopausal</b>                          | 12.1%                       | -                         | -               |
| <b>Black Race</b>                              | 47.3%                       | 42.1%                     | <0.01           |
| <b>Body Mass Index (BMI; kg/m<sup>2</sup>)</b> | 28.9 ± 7.2                  | 28.0 ± 4.9                | <0.01           |
| <b>≥ College degree</b>                        | 48.5%                       | 45.6%                     | 0.15            |
| <b>Smoking</b>                                 |                             |                           |                 |
| <b>Never</b>                                   | 59.8%                       | 61.8%                     | <0.01           |
| <b>Former</b>                                  | 20.8%                       | 16.0%                     |                 |
| <b>Current</b>                                 | 19.4%                       | 22.2%                     |                 |
| <b>Cumulative Pack-Years</b>                   | Not Available               | Not available             | -               |
| <b>Physical Activity, EU *</b>                 | 290 ± 249                   | 429 ± 307                 | <0.01           |
| <b>Systolic Blood Pressure, mmHg</b>           | 111 ± 15                    | 115 ± 14                  | <0.01           |
| <b>Total Cholesterol, mg/dl</b>                | 182 ± 32                    | 189 ± 38                  | <0.01           |
| <b>HDL Cholesterol, mg/dl</b>                  | 55 ± 14                     | 45 ± 13                   | <0.01           |
| <b>Triglycerides, mg/dl</b>                    | 89 ± 58                     | 126 ± 124                 | <0.01           |
| <b>Serum Creatinine, mg/dl</b>                 | 0.76 ± 0.24                 | 1.00 ± 0.50               | <0.01           |
| <b>Diabetes Medication Use</b>                 | 2.3%                        | 2.0%                      | 0.65            |
| <b>Fasting Glucose, mg/dl</b>                  | 92 ± 20                     | 96 ± 19                   | <0.01           |
| <b>Antihypertensive Medication Use</b>         | 7.4%                        | 7.3%                      | 0.95            |
| <b>Cholesterol Lowering Medication Use</b>     | 3.9%                        | 1.0%                      | <0.01           |
| <b>Plasma IsoP, ng/L<sup>†</sup></b>           | 57.2<br>[41.8, 80.9]        | 45.9<br>[36.9, 59.5]      | <0.01           |

Data presented as mean ± SD, median [IQR], or percentage of participants

\* EU: Exercise units † IsoP: 8-isoprostane

**Supplementary Table S3.** Replacing different diabetes-related variables into the models

| Diabetes-related variable |                          | Model 1                              | Model 2                              | Model 3                              | Model 4                              |
|---------------------------|--------------------------|--------------------------------------|--------------------------------------|--------------------------------------|--------------------------------------|
| Urinary<br>IsoP           | Original DM variable*    | 0.94<br>(0.79 to 1.12)               | 0.91<br>(0.77 to 1.09)               | 0.90<br>(0.75 to 1.07)               | 0.95<br>(0.79 to 1.15)               |
|                           | Hemoglobin A1c (per SD)  | 0.99<br>(0.93 to 1.05)               | 0.98<br>(0.92 to 1.04)               | 0.97<br>(0.91 to 1.03)               | 1.00<br>(0.92 to 1.07)               |
|                           | Log HOMA-IR (per SD)     | 0.96<br>(0.90 to 1.04)               | 0.96<br>(0.89 to 1.03)               | 0.96<br>(0.90 to 1.04)               | 0.96<br>(0.88 to 1.04)               |
|                           | Fasting Glucose (per SD) | 1.01<br>(0.95 to 1.07)               | 1.00<br>(0.94 to 1.06)               | 0.99<br>(0.93 to 1.05)               | 1.01<br>(0.94 to 1.07)               |
|                           | Diabetes Medication use  | 1.04<br>(0.83 to 1.30)               | 1.01<br>(0.81 to 1.27)               | 1.00<br>(0.80 to 1.25)               | 1.14<br>(0.88 to 1.46)               |
|                           |                          |                                      |                                      |                                      |                                      |
| Urinary<br>IsoP-M         | Original DM variable*    | 0.88<br>(0.72 to 1.08)               | 0.86<br>(0.70 to 1.06)               | 0.86<br>(0.70 to 1.06)               | <b>0.84</b><br><b>(0.70 to 1.02)</b> |
|                           | Hemoglobin A1c (per SD)  | 0.99<br>(0.93 to 1.06)               | 0.99<br>(0.93 to 1.05)               | 0.98<br>(0.92 to 1.04)               | 1.00<br>(0.93 to 1.08)               |
|                           | Log HOMA-IR (per SD)     | 0.94<br>(0.88 to 1.01)               | 0.94<br>(0.87 to 1.01)               | 0.95<br>(0.88 to 1.02)               | <b>0.91</b><br><b>(0.84 to 0.99)</b> |
|                           | Fasting Glucose (per SD) | 1.00<br>(0.94 to 1.06)               | 0.99<br>(0.93 to 1.05)               | 0.98<br>(0.92 to 1.04)               | 0.97<br>(0.91 to 1.03)               |
|                           | Diabetes Medication use  | 1.01<br>(0.81 to 1.27)               | 1.00<br>(0.79 to 1.25)               | 0.99<br>(0.79 to 1.24)               | 0.91<br>(0.71 to 1.17)               |
|                           |                          |                                      |                                      |                                      |                                      |
| Plasma<br>IsoP            | Original DM variable*    | <b>0.90</b><br><b>(0.84 to 0.93)</b> | <b>0.90</b><br><b>(0.83 to 0.97)</b> | <b>0.89</b><br><b>(0.83 to 0.96)</b> | <b>0.89</b><br><b>(0.83 to 0.96)</b> |
|                           | Hemoglobin A1c (per SD)  | -                                    | -                                    | -                                    | -                                    |
|                           | Log HOMA-IR (per SD)     | 0.99<br>(0.97 to 1.00)               | 0.99<br>(0.97 to 1.00)               | 0.98<br>(0.97 to 1.00)               | <b>0.98</b><br><b>(0.96 to 1.00)</b> |
|                           | Fasting Glucose (per SD) | <b>0.97</b><br><b>(0.95 to 0.98)</b> | <b>0.97</b><br><b>(0.95 to 0.98)</b> | <b>0.97</b><br><b>(0.95 to 0.98)</b> | <b>0.96</b><br><b>(0.95 to 0.98)</b> |
|                           | Diabetes Medication use  | <b>0.87</b><br><b>(0.79 to 0.96)</b> | <b>0.86</b><br><b>(0.78 to 0.95)</b> | <b>0.86</b><br><b>(0.78 to 0.95)</b> | <b>0.85</b><br><b>(0.77 to 0.94)</b> |
|                           |                          |                                      |                                      |                                      |                                      |

Models were constructed as described in the methods section, with each of the listed diabetes-related variables being replaced in each model separately to assess robustness of the associations to variable definition.

\* **Diabetes:** use of diabetes medications or fasting glucose  $\geq 126$  mg/dL

**Supplementary Table S4.** Plasma Iso-P Models in Participants Also in Urine Isoprostane Analyses

|                                    | Model 1                              |                                      | Model 4                              |                                      |
|------------------------------------|--------------------------------------|--------------------------------------|--------------------------------------|--------------------------------------|
|                                    | All Y15<br>Participants              | Overlapping<br>Participants          | All Y15<br>Participants              | Overlapping<br>Participants          |
| <b>Age (per SD)</b>                | <b>0.98</b><br><b>(0.97 to 1.00)</b> | 1.00<br>(0.97 to 1.04)               | <b>0.97</b><br><b>(0.96 to 0.99)</b> | 0.99<br>(0.96 to 1.02)               |
| <b>Female Sex (vs. Male Sex)</b>   | <b>1.26</b><br><b>(1.23 to 1.30)</b> | <b>1.24</b><br><b>(1.16 to 1.32)</b> | <b>1.21</b><br><b>(1.17 to 1.26)</b> | <b>1.27</b><br><b>(1.15 to 1.40)</b> |
| <b>Black Race (vs. White)</b>      | <b>0.90</b><br><b>(0.87 to 0.93)</b> | <b>0.86</b><br><b>(0.80 to 0.93)</b> | <b>0.89</b><br><b>(0.86 to 0.92)</b> | <b>0.86</b><br><b>(0.79 to 0.93)</b> |
| <b>BMI (per SD)</b>                | <b>1.16</b><br><b>(1.14 to 1.18)</b> | <b>1.18</b><br><b>(1.14 to 1.23)</b> | <b>1.18</b><br><b>(1.16 to 1.20)</b> | <b>1.18</b><br><b>(1.13 to 1.22)</b> |
| <b>Current Smoking (vs. Never)</b> | <b>1.12</b><br><b>(1.08 to 1.16)</b> | <b>1.10</b><br><b>(1.00 to 1.20)</b> | <b>1.11</b><br><b>(1.07 to 1.15)</b> | 1.09<br>(0.99 to 1.19)               |
| <b>Diabetes*</b>                   | <b>0.90</b><br><b>(0.84 to 0.93)</b> | <b>0.94</b><br><b>(0.79 to 1.11)</b> | <b>0.89</b><br><b>(0.83 to 0.96)</b> | 0.95<br>(0.81 to 1.12)               |
| <b>Blood Pressure Medication</b>   | 0.95<br>(0.90 to 1.00)               | 0.93<br>(0.82 to 1.07)               | <b>0.92</b><br><b>(0.87 to 0.98)</b> | <b>0.83</b><br><b>(0.72 to 0.95)</b> |
| <b>Systolic BP (per SD)</b>        | <b>1.02</b><br><b>(1.00 to 1.04)</b> | <b>1.05</b><br><b>(1.02 to 1.09)</b> | 1.01<br>(1.00 to 1.03)               | <b>1.05</b><br><b>(1.02 to 1.09)</b> |
| <b>Cholesterol-lowering Meds</b>   | 1.07<br>(0.97 to 1.18)               | 1.07<br>(0.82 to 1.39)               | <b>1.11</b><br><b>(1.01 to 1.23)</b> | <b>1.14</b><br><b>(0.88 to 1.47)</b> |
| <b>Total Cholesterol (per SD)</b>  | <b>1.02</b><br><b>(1.00 to 1.03)</b> | 1.01<br>(0.98 to 1.05)               | <b>0.98</b><br><b>(0.96 to 1.00)</b> | <b>0.95</b><br><b>(0.92 to 0.99)</b> |
| <b>HDL Cholesterol (per SD)</b>    | <b>1.07</b><br><b>(1.05 to 1.09)</b> | <b>1.06</b><br><b>(1.02 to 1.10)</b> | <b>1.11</b><br><b>(1.09 to 1.13)</b> | <b>1.12</b><br><b>(1.07 to 1.17)</b> |
| <b>Log Triglycerides (per SD)</b>  | <b>1.03</b><br><b>(1.01 to 1.04)</b> | <b>1.06</b><br><b>(1.02 to 1.10)</b> | <b>1.07</b><br><b>(1.05 to 1.10)</b> | <b>1.12</b><br><b>(1.07 to 1.16)</b> |
| <b>Serum Creatinine (per SD)</b>   | 1.01<br>(1.00 to 1.03)               | 1.02<br>(0.98 to 1.07)               | <b>1.02</b><br><b>(1.00 to 1.03)</b> | 1.04<br>(1.00 to 1.09)               |
| <b>Physical Activity (per SD)</b>  | <b>0.97</b><br><b>(0.96 to 0.99)</b> | 0.97<br>(0.94 to 1.00)               | <b>0.97</b><br><b>(0.95 to 0.98)</b> | <b>0.96</b><br><b>(0.92 to 0.99)</b> |

Statistically significant results ( $p < 0.05$ ) were **bolded**. Exponentiated beta-coefficients are equivalent to geometric ratios of analyte of interest. Ratios  $>1$  represent positive correlation and ratios  $<1$  represent inverse correlation.

Models were progressively adjusted as follows:

Model 1—Single CV risk factor + age, sex, race, BMI, college attainment, study center;

Model 4—All CV risk factors mutually adjusted (diabetes, hypertension medication, systolic blood pressure, lipid lowering medication, total cholesterol, HDL cholesterol, fasting triglyceride concentrations [log transformed], physical activity) + serum creatinine + smoking status (current, former, or never) +

Model 1;

\* **Diabetes:** use of diabetes medications or fasting glucose  $\geq 126$  mg/dL

**Supplementary Table S5.** P values for interaction terms between each of the covariates and sex or race in the fully adjusted model

|                                    | P value for Interaction term |        |      |        |
|------------------------------------|------------------------------|--------|------|--------|
|                                    | Sex                          |        | Race |        |
|                                    | IsoP                         | IsoP-M | IsoP | IsoP-M |
| <b>Black Race (vs. White)</b>      | 0.42                         | 0.34   | -    | -      |
| <b>BMI (per SD)</b>                | 0.02                         | 0.28   | 0.07 | 0.05   |
| <b>Current Smoking (vs. Never)</b> | 0.42                         | 0.71   | 0.24 | 0.58   |
| <b>Former Smoking (vs. Never)</b>  | 0.03                         | 0.50   | 0.84 | 0.48   |
| <b>Cumulative Pack-years</b>       | 0.77                         | 0.71   | 0.50 | 0.60   |
| <b>Diabetes</b>                    | 0.54                         | 0.82   | 0.14 | 0.75   |
| <b>Blood Pressure Medication</b>   | 0.99                         | 0.49   | 0.07 | 0.12   |
| <b>Systolic BP (per SD)</b>        | 0.26                         | 0.29   | 0.25 | 0.02   |
| <b>Cholesterol-lowering Meds</b>   | 0.17                         | 0.83   | 0.07 | 0.02   |
| <b>Total Cholesterol (per SD)</b>  | 0.06                         | 0.11   | 0.17 | 0.27   |
| <b>HDL Cholesterol (per SD)</b>    | 0.57                         | 0.81   | 0.75 | 0.58   |
| <b>Log Triglycerides (per SD)</b>  | 0.27                         | 0.01   | 0.81 | 0.16   |
| <b>Serum Creatinine (per SD)</b>   | 0.04                         | 0.40   | 0.95 | 0.97   |
| <b>Physical Activity (per SD)</b>  | 0.21                         | 0.89   | 0.02 | 0.46   |

**Supplementary Table S6.** Interactions between Sex/Race and BMI on urinary isoprostanes

|               | $\beta$ for Male    | $\beta$ for Female  | $p$  | $\beta$ for Black   | $\beta$ for White   | $p$  |
|---------------|---------------------|---------------------|------|---------------------|---------------------|------|
| <b>IsoP</b>   | 0.89<br>(0.79-1.02) | 1.05<br>(0.98-1.14) | 0.02 | 1.09<br>(0.98-1.20) | 0.97<br>(0.89-1.06) | 0.07 |
| <b>IsoP-M</b> | 1.07<br>(0.94-1.22) | 1.16<br>(1.07-1.25) | 0.28 | 1.22<br>(1.11-1.35) | 1.08<br>(0.99-1.18) | 0.05 |
